# Supplementary material
Source: publisher site journal article supplement (http://www.degruyter.com/publication/journal_key/ERJ/downloadAsset/ERJ_Call%20for%20Commentaries.pdf)
Supplement: Supplementary file 1 [file ERJ_Call%20for%20Commentaries.pdf]

# ***Entrepreneurship Research Journal***

## **Call for Commentaries**

***Entrepreneurship Research Journal (ERJ) Commentaries*** are intended to serve any of these four purposes: 1) a response to a published article in the ERJ; 2) an extension of a published article in ERJ or other scholarly journals; 3) a literature review of a contemporary research area in entrepreneurship; or 4) a special focus on a specific new or cutting-edge area of entrepreneurship research. All commentaries must include delineated research implications/applications for scholars to consider for future entrepreneurship research.

The length of a Commentary can vary depending on the area of interest and the purpose. You are invited to review ERJ regular and special issues at [www.degruyter.com/erj](http://www.degruyter.com/erj). You may upload the commentary for editorial review via our ERJ website at <https://mc.manuscriptcentral.com/dgerj> **with a cover letter identifying the submission as a Commentary**. ERJ Tri-Editors, **Chandra Mishra, Florida Atlantic University, USA; Ramona Zachary, Baruch College, USA; and Thomas Lyons, Baruch College, USA** will manage the review of your Commentary submission. For detailed formatting and submission instructions, please visit [www.degruyter.com/erj](http://www.degruyter.com/erj) and click the "Submission of Manuscripts" tab.

### ***About the ERJ:***

***The [Entrepreneurship Research Journal \(ERJ\)](http://www.degruyter.com/erj) is the official journal of the ERS. ERJ posits as the new leading and premier research journal within the field of entrepreneurship. Proud to Publish the ERJ, De Gruyter is an international publishing house with more than two-hundred and sixty years of experience partnering with exceptional scholars. Combining this strong tradition with modern innovation, De Gruyter and the ERJ provide authors international presence and modern publishing technologies that ensure their research reaches engaged readers globally.***

***Publish along with leading scholars such as Ronald Coase, William Baumol, Howard Aldrich, Mike Wright, and many others! The Entrepreneurship Research Journal seeks to encourage a scholar exchange between researchers from any field of study who focus on entrepreneurs and their impact on managerial or public policy.***

***The ERJ is positioned as a featured journal in a growing program of twenty-five economics journals published by De Gruyter. As an established publisher with an expanding international presence, your work will be marketed in every major academic market in the world, with previous economics marketing campaigns reaching over 28,000 individuals directly. The ERJ is also featured at major conferences such as the AEA's Allied Social Sciences Association annual meeting. In addition, upon publication, your work will be automatically indexed in sixteen major abstracting & indexing services including Thomson ISI.***

***For more information about the Entrepreneurship Research Journal, please visit [www.degruyter.com/erj](http://www.degruyter.com/erj) online.***
